# Supplementary material for: Voxel‐Based quantitative MRI reveals spatial patterns of grey matter alteration in multiple sclerosis
Source: PubMed Central journal article supplement (PMC7856642; doi:10.1002/hbm.25274), 2020-11-06
Supplement: HBM-42-1003-s001.pdf [file HBM-42-1003-s001.pdf]

**Table S1: Regions with significantly reduced grey matter MT saturation in MS patients compared to healthy controls.**

| Cluster-level    |              | Voxel-level     |              | MNI coordinates of local maxima |     |     | Side | Anatomical regions      |
|------------------|--------------|-----------------|--------------|---------------------------------|-----|-----|------|-------------------------|
| Number of voxels | p-FWER corr. | F-value (1, 66) | p-FWER corr. |                                 |     |     |      |                         |
| <b>1987</b>      | <0.0001      | 84.42           | <0.0001      | 45                              | -18 | 6   | R    | Heschl's gyrus          |
|                  |              | 53.33           | <0.0001      | 37                              | -21 | 0   | R    | Insula                  |
| <b>463</b>       | <0.0001      | 40.10           | 0.009        | 25                              | -31 | -4  | R    | Hippocampus             |
| <b>166</b>       | 0.014        | 41.48           | 0.006        | 69                              | -23 | 3   | R    | Superior temporal gyrus |
| <b>107</b>       | 0.071        | 38.03           | 0.016        | 47                              | -14 | -6  | R    | Superior temporal gyrus |
| <b>297</b>       | 0.001        | 30.47           | 0.139        | 38                              | 8   | -17 | R    | Superior temporal gyrus |
| <b>130</b>       | 0.037        | 30.40           | 0.142        | 28                              | 52  | 7   | R    | Superior frontal gyrus  |
| <b>127</b>       | 0.040        | 29.15           | 0.201        | 29                              | -59 | 51  | R    | Angular gyrus           |
| <b>157</b>       | 0.017        | 36.99           | 0.022        | 38                              | -15 | 39  | R    | Precentral gyrus        |
| <b>220</b>       | 0.004        | 39.38           | 0.011        | -37                             | -28 | 10  | L    | Heschl's gyrus          |
| <b>220</b>       | 0.004        | 36.36           | 0.026        | -34                             | -23 | 1   | L    | Heschl's gyrus          |
| <b>857</b>       | <0.0001      | 40.09           | 0.009        | -31                             | -27 | -7  | L    | Hippocampus             |
| <b>135</b>       | 0.032        | 37.70           | 0.018        | 0                               | -26 | 36  | L    | Cingulum                |
| <b>189</b>       | 0.008        | 36.14           | 0.028        | -43                             | -14 | 42  | L    | Postcentral gyrus       |
| <b>120</b>       | 0.049        | 28.86           | 0.217        | -34                             | -6  | 46  | L    | Precentral gyrus        |
| <b>844</b>       | <0.0001      | 33.38           | 0.061        | 0                               | -1  | -9  | L    | Caudate                 |

**Tables S2: Regions with significantly reduced grey matter R1 in MS patients compared to healthy controls.**

| Cluster-level    |              | Voxel-level     |              | MNI coordinates of local maxima |     |     | Side | Anatomical regions      |
|------------------|--------------|-----------------|--------------|---------------------------------|-----|-----|------|-------------------------|
| Number of voxels | p-FWER corr. | F-value (1, 66) | p-FWER corr. |                                 |     |     |      |                         |
| <b>319</b>       | 0.001        | 55.88           | <0.0001      | -46                             | 3   | -25 | L    | Middle temporal gyrus   |
| <b>143</b>       | 0.030        | 45.57           | 0.004        | -44                             | -52 | 19  | L    | Middle temporal gyrus   |
| <b>727</b>       | <0.0001      | 39.09           | 0.011        | -33                             | -19 | 17  | L    | Insula                  |
|                  |              | 35.14           | 0.035        | -40                             | -27 | 9   | L    | Heschl's gyrus          |
| <b>295</b>       | 0.001        | 37.56           | 0.018        | -46                             | -60 | -15 | L    | Inferior temporal gyrus |
| <b>153</b>       | 0.023        | 34.57           | 0.041        | -52                             | -8  | -5  | L    | Superior temporal gyrus |
| <b>130</b>       | 0.042        | 32.26           | 0.080        | -34                             | -23 | 1   | L    | Insula                  |
| <b>1330</b>      | <0.0001      | 48.75           | 0.001        | -30                             | -31 | -4  | L    | Hippocampus             |
| <b>266</b>       | 0.002        | 26.60           | 0.375        | -22                             | -54 | -3  | L    | Lingual gyrus           |
| <b>351</b>       | <0.0001      | 43.91           | 0.003        | 47                              | -44 | 10  | R    | Middle temporal gyrus   |
| <b>721</b>       | <0.0001      | 35.18           | 0.035        | 27                              | -24 | -9  | R    | Hippocampus             |
| <b>132</b>       | 0.040        | 29.98           | 0.153        | 38                              | -30 | 45  | R    | Postcentral gyrus       |
| <b>116</b>       | 0.062        | 35.29           | 0.034        | 38                              | -14 | 39  | R    | Precentral gyrus        |
| <b>142</b>       | 0.030        | 27.45           | 0.303        | 0                               | -23 | 27  | R    | Cingulum                |

**Tables S3: Regions with significantly reduced grey matter R2\* in MS patients compared to healthy controls.**

| Cluster-level    |              | Voxel-level     |              | MNI coordinates of local maxima |     |     | Side | Anatomical regions      |
|------------------|--------------|-----------------|--------------|---------------------------------|-----|-----|------|-------------------------|
| Number of voxels | p-FWER corr. | F-value (1, 66) | p-FWER corr. |                                 |     |     |      |                         |
| <b>331</b>       | <0.0001      | 33.76           | 0.055        | -55                             | -24 | -32 | L    | Inferior temporal gyrus |
| <b>181</b>       | 0.009        | 31.95           | 0.092        | -49                             | 6   | -28 | L    | Middle temporal gyrus   |
| <b>136</b>       | 0.031        | 30.04           | 0.157        | -42                             | -15 | 40  | L    | Postcentral gyrus       |

**Tables S4: Regions with significantly reduced grey matter volume (VBM) in MS patients compared to healthy controls.**

| Cluster-level    |              | Voxel-level     |              | MNI coordinates of local maxima |     |     | Side | Anatomical regions              |
|------------------|--------------|-----------------|--------------|---------------------------------|-----|-----|------|---------------------------------|
| Number of voxels | p-FWER corr. | F-value (1, 66) | p-FWER corr. |                                 |     |     |      |                                 |
| <b>1486</b>      | <0.0001      | 129.82          | <0.0001      | 38                              | -21 | 63  | R    | Precentral gyrus                |
| <b>1509</b>      | <0.0001      | 109.51          | <0.0001      | 5                               | -12 | -12 | R    | Thalamus                        |
|                  |              | 78.59           | <0.0001      | 18                              | -26 | -9  | R    | Hippocampus                     |
|                  |              | 64.73           | <0.0001      | 5                               | -33 | -9  | L    | Superior and inferior colliculi |
| <b>460</b>       | <0.0001      | 71.79           | <0.0001      | 41                              | -23 | 9   | R    | Heschl's gyrus                  |
| <b>421</b>       | <0.0001      | 43.59           | <0.0001      | 8                               | -81 | -3  | R    | Lingual gyrus                   |
| <b>72</b>        | 0.027        | 41.27           | 0.03         | 15                              | -51 | -2  | R    | Lingual gyrus                   |
| <b>333</b>       | <0.0001      | 43.59           | 0.002        | 6                               | -84 | 17  | R    | Cuneus                          |
| <b>263</b>       | <0.0001      | 36.17           | 0.013        | 33                              | 9   | -3  | R    | Putamen                         |
| <b>263</b>       | <0.0001      | 36.17           | 0.013        | 33                              | 9   | -3  | R    | Putamen                         |
| <b>1467</b>      | <0.0001      | 148.63          | <0.0001      | -27                             | -27 | 57  | L    | Precentral gyrus                |
| <b>555</b>       | <0.0001      | 57.83           | <0.0001      | -42                             | -21 | 5   | L    | Superior temporal gyrus         |
|                  |              | 48.23           | <0.0001      | -38                             | -24 | 11  | L    | Heschl's gyrus                  |
| <b>294</b>       | <0.0001      | 42.81           | 0.002        | -14                             | -95 | -6  | L    | Lingual gyrus                   |
| <b>118</b>       | 0.004        | 27.90           | 0.146        | -6                              | -89 | 2   | L    | Cuneus                          |
| <b>535</b>       | <0.0001      | 39.93           | 0.005        | -30                             | 8   | -9  | L    | Putamen                         |
| <b>65</b>        | <0.0001      | 39.93           | 0.005        | -30                             | 8   | -6  | L    | Putamen                         |
| <b>62</b>        | 0.043        | 27.87           | 0.148        | -30                             | -59 | 50  | L    | Inferior parietal gyrus         |

**Tables S5: Clusters where regional MT, R1 and R2\* decrease with lesion fraction.**

| qMRI | Anatomical regions             | Side | MNI coordinates of local maxima |     |    | Number of voxels | Local maximum F-value (1,66) | p-FWER corr. |
|------|--------------------------------|------|---------------------------------|-----|----|------------------|------------------------------|--------------|
|      |                                |      |                                 |     |    |                  |                              |              |
| MT   | Medial superior frontal cortex | L    | 2                               | 51  | 20 | <b>172</b>       | 6.75                         | 0.006        |
| MT   | Thalamus                       | R    | 14                              | -15 | 18 | <b>1316</b>      | 6.08                         | <0.0001      |
|      | Caudate                        | R    | 13                              | 9   | 20 |                  | 5.85                         |              |
| MT   | Thalamus                       | R    | 2                               | -13 | 6  | <b>416</b>       | 5.45                         | <0.0001      |
|      | Thalamus                       | L    | 1                               | -4  | -7 |                  | 5.00                         |              |
| MT   | Caudate                        | L    | -7                              | 7   | 8  | <b>138</b>       | 5.35                         | 0.018        |
| MT   | Thalamus                       | L    | -10                             | -13 | 17 | <b>116</b>       | 5.00                         | 0.036        |
| R1   | Thalamus                       | L    | -6                              | -29 | 4  | <b>3643</b>      | 8.05                         | <0.0001      |
|      | Caudate                        | R    | 19                              | -6  | 24 |                  | 7.40                         |              |
|      | Thalamus                       | R    | 2                               | -19 | 5  |                  | 7.14                         |              |
| R2   | Thalamus                       | R    | 13                              | -14 | 18 | <b>196</b>       | 6.12                         | 0.006        |
| R2   | Anterior cingulum              | L    | -2                              | 26  | 24 | <b>160</b>       | 6.04                         | 0.015        |

**Table S6: Clusters where cognitive score decreases with regional reduction of R1.**

| qMRI | Anatomical regions                 | Side | MNI coordinates of local maxima |    |    | Number of voxels | Local maximum F-value (1,66) | p-FWER corr. |
|------|------------------------------------|------|---------------------------------|----|----|------------------|------------------------------|--------------|
|      |                                    |      |                                 |    |    |                  |                              |              |
| R1   | Middle frontal gyrus, orbital part | R    | 39                              | 56 | -3 | <b>126</b>       | 7.54                         | 0.039        |
